# Supplementary material for: Lifestyle and Subsequent Malignant Neoplasms in Childhood Cancer Survivors: A Report from the St. Jude Lifetime Cohort Study
Source: MDPI journal article supplement (doi:10.3390/cancers16050864), 2024-02-21
Supplement: s1 [file s1]

**Supplementary Table S1.** Distribution of types of first SMN in each individual during follow-up.

| SMN type                     | Frequency | Percent | Cumulative Frequency | Cumulative Percent |
|------------------------------|-----------|---------|----------------------|--------------------|
| Breast                       | 36        | 20.22   | 36                   | 20.22              |
| Gastrointestinal             | 26        | 14.61   | 62                   | 34.83              |
| Hematological                | 9         | 5.06    | 71                   | 39.89              |
| Meningioma (malignant)       | 3         | 1.69    | 74                   | 41.57              |
| Other central nervous system | 7         | 3.93    | 81                   | 45.51              |
| Other Solid Tumors           | 27        | 15.17   | 108                  | 60.67              |
| Sarcoma                      | 16        | 8.99    | 124                  | 69.66              |
| Thyroid                      | 37        | 20.79   | 161                  | 90.45              |
| Urologic                     | 17        | 9.55    | 178                  | 100.00             |

**Supplementary Table S2.** Mortality during follow-up in participants who did or did not develop an SMN during follow-up.

| Developed SMN | Died during follow-up, n (%) | Total |
|---------------|------------------------------|-------|
| Yes           | 40 (22.5)                    | 178   |
| No            | 146 (37.5)                   | 3894  |

**Supplementary Table S3.** Cardiorespiratory fitness at baseline, as assessed by six-minute walk test, by survivors of Hodgkin lymphoma or other childhood cancer diagnosis.

|                     | 1st quartile | 2nd quartile | 3rd quartile | 4th quartile | Total |
|---------------------|--------------|--------------|--------------|--------------|-------|
| Hodgkin survivors   | 96 (20.9%)   | 104 (22.7%)  | 111 (24.2%)  | 148 (32.2%)  | 459   |
| All other survivors | 876 (25.4%)  | 905 (26.2%)  | 839 (24.3%)  | 830 (24.1%)  | 3,450 |

The 1st quartile is the least fit and the 4th quartile the most fit group.
